# Supplementary material
Source: PubMed Central journal article supplement (PMC2871165)
Supplement: NIHMS196922-supplement-Supplementary_Material.pdf [file NIHMS196922-supplement-Supplementary_Material.pdf]

SUPPLEMENTARY MATERIAL FOR:

**Quantification of small cell numbers with a microchannel device**Nisha M. Badders<sup>1</sup>, Hongmei Yu<sup>2</sup>, Caroline M. Alexander<sup>1</sup>, and David J. Beebe<sup>2</sup><sup>1</sup>McArdle Laboratory for Cancer Research and <sup>2</sup>Department of Biomedical Engineering, University of Wisconsin, Madison, Madison, WI, USA*BioTechniques* 45:321-325 (September 2008)

The microcounter design was produced using Illustrator 9.0 (Adobe, San Jose, CA, USA) and printed onto a transparency film. The channel dimensions were 0.1 mm (*h*) × 200 mm (*l*) × 0.5 mm (*w*), while the grid pattern consisted of twenty 10 μm (*h*) × 0.5 mm (*w*) squares molded into the ceiling of each channel. Photoresist SU-8 100

(Microchem Corporation, Newton, MA, USA) was spin-coated onto a 3-inch silicon wafer, baked at 95°C for 1.5 h, overlaid with the transparency film, and exposed to 200 mJ/cm<sup>2</sup> UV. The wafer was then baked at 150°C for 3 h and developed with a SU-8 developer (Microchem Corp.). The master was then air-dried and hard baked at

95°C for 30 min. PDMS prepolymer (Sylgard 184 Silicone Elastomer kit, Dow Corning, Midland, MI, USA) was then mixed 10:1 with curing agent and poured onto the master. The polydimethylsiloxane (PDMS) microchannels were then cured at 80°C for 2 h and subsequently exposed to UV for 20 min.

**Supplementary Table S1. Statistical Data of Each Counting Device**

| Hemocytometer                                                                                                                                                                                                                                                                                                                                                                                                                                                                                                                                                                                                                                                                  | Mean    | sd     | Confidence | <i>n</i> |
|--------------------------------------------------------------------------------------------------------------------------------------------------------------------------------------------------------------------------------------------------------------------------------------------------------------------------------------------------------------------------------------------------------------------------------------------------------------------------------------------------------------------------------------------------------------------------------------------------------------------------------------------------------------------------------|---------|--------|------------|----------|
| 100,000                                                                                                                                                                                                                                                                                                                                                                                                                                                                                                                                                                                                                                                                        | 107,500 | 25,372 | 20,302     | 6        |
| 50,000                                                                                                                                                                                                                                                                                                                                                                                                                                                                                                                                                                                                                                                                         | 52,592  | 18,143 | 14,517     | 6        |
| 25,000                                                                                                                                                                                                                                                                                                                                                                                                                                                                                                                                                                                                                                                                         | 30,416  | 17,206 | 13,767     | 6        |
| 12,500                                                                                                                                                                                                                                                                                                                                                                                                                                                                                                                                                                                                                                                                         | 19,166  | 9443   | 7556       | 6        |
| 6250                                                                                                                                                                                                                                                                                                                                                                                                                                                                                                                                                                                                                                                                           | 5416    | 3323   | 2659       | 6        |
| 3125                                                                                                                                                                                                                                                                                                                                                                                                                                                                                                                                                                                                                                                                           | n/d     | n/d    | n/d        | –        |
| 1562                                                                                                                                                                                                                                                                                                                                                                                                                                                                                                                                                                                                                                                                           | n/d     | n/d    | n/d        | –        |
| Microcounter                                                                                                                                                                                                                                                                                                                                                                                                                                                                                                                                                                                                                                                                   |         |        |            |          |
| 100,000                                                                                                                                                                                                                                                                                                                                                                                                                                                                                                                                                                                                                                                                        | 90,250  | 15,798 | 12,641     | 6        |
| 50,000 <sup>a</sup>                                                                                                                                                                                                                                                                                                                                                                                                                                                                                                                                                                                                                                                            | 58,214  | 6109   | 4888       | 6        |
| 25,000 <sup>a</sup>                                                                                                                                                                                                                                                                                                                                                                                                                                                                                                                                                                                                                                                            | 24,583  | 4104   | 3284       | 6        |
| 12,500 <sup>a</sup>                                                                                                                                                                                                                                                                                                                                                                                                                                                                                                                                                                                                                                                            | 10,333  | 2503   | 2003       | 6        |
| 6250                                                                                                                                                                                                                                                                                                                                                                                                                                                                                                                                                                                                                                                                           | 7500    | 3082   | 2466       | 6        |
| 3125                                                                                                                                                                                                                                                                                                                                                                                                                                                                                                                                                                                                                                                                           | 4667    | 2887   | 3267       | 3        |
| 1562                                                                                                                                                                                                                                                                                                                                                                                                                                                                                                                                                                                                                                                                           | 1000    | 1000   | 1131       | 3        |
| <sup>a</sup> <i>P</i> < 0.05.<br>The initial concentration of 293 cells was determined with the hemacytometer. The volume was then adjusted to attain a concentration of 50,000 cells/ml and serially diluted to achieve each subsequent concentration. The cells for each theoretical concentration were counted in duplicate with each device. The mean cell counts (cells/ml) were determined from six independent experiments. The standard deviation (sd) and confidence limits (95% confidence level) were determined for each mean, and statistical significance was determined by analysis of variance (ANOVA) for repeated measures and multiple comparison F-ratios. |         |        |            |          |
